# Supplementary material for: Households’ Practices towards Rabies Prevention and Control in Rural Nepal
Source: MDPI journal article supplement (doi:10.3390/ijerph20075427), 2023-04-06
Supplement: s1 [file s1]

# Households' practices towards rabies prevention and control in rural Nepal

ID:  
GPS reading:

Date:

Address:

Interviewer:

## 1. General questions

In this section you are asked about pet and domestic animals in your house. Pet animals refers to dogs and cats.

|           |                                                                                                                                                                    |            |                                                                                                                                                                                       |           |                              |            |                     |     |       |
|-----------|--------------------------------------------------------------------------------------------------------------------------------------------------------------------|------------|---------------------------------------------------------------------------------------------------------------------------------------------------------------------------------------|-----------|------------------------------|------------|---------------------|-----|-------|
| <b>1a</b> | Do you have any pet animal(s) in your house?<br>a. Yes <input type="checkbox"/> (Go to 1b to specify the pets number)<br>b. No <input type="checkbox"/> (Go to 1d) | <b>1c</b>  | Are there any domestic animal(s) at your household?<br>a. Yes <input type="checkbox"/> (Go to 1d and specify their corresponding number)<br>b. No <input type="checkbox"/> (Go to 2a) |           |                              |            |                     |     |       |
| <b>1b</b> | 1b1: Dog (n):<br>1b1a: Years of keeping (YOK):                                                                                                                     | <b>1b2</b> | Cat (n):<br>1b2a: YOK:                                                                                                                                                                | <b>1d</b> | 1d1: Cattle:<br>1d4: Poultry | 1d2<br>1d5 | Buffalo:<br>Others: | 1d3 | Goat: |

## 2. Practices towards Rabies

|    |                                                                                                                                                                                                                                                                                                                                                       |
|----|-------------------------------------------------------------------------------------------------------------------------------------------------------------------------------------------------------------------------------------------------------------------------------------------------------------------------------------------------------|
| 2a | Do you vaccinate your dog/cat against rabies? (If you do not have pet animals, Skip to 2d) a. Yes <input type="checkbox"/> b. No <input type="checkbox"/>                                                                                                                                                                                             |
| 2b | Do you keep record of Rabies vaccination of your pet animals? a. Yes <input type="checkbox"/> b. No <input type="checkbox"/>                                                                                                                                                                                                                          |
| 2c | Do you restrict your dog(s)/ cat(s) to roam in the community? a. Yes <input type="checkbox"/> b. No <input type="checkbox"/>                                                                                                                                                                                                                          |
| 2d | What immediate action(s) do you take after being bitten by a rabid or rabid suspected animal? <i>Select all that apply.</i><br>a. Washing with soap and water <input type="checkbox"/> b. Go to traditional healer <input type="checkbox"/> c. Visit hospital <input type="checkbox"/> d. Do nothing <input type="checkbox"/> e. Other specify: _____ |
| 2e | What action do you take on presumed rabid animal after it bites others? a. Tie/cage <input type="checkbox"/> b. Kill <input type="checkbox"/> c. Do noting <input type="checkbox"/> d. Other specify: _____                                                                                                                                           |
| 2f | Do you inform concerned authorities if you see someone bitten by a presumed rabid dog/ animal?<br>a. Yes <input type="checkbox"/> b. No <input type="checkbox"/>                                                                                                                                                                                      |
| 2g | Will you report to concerned authority if you find the behavior of dog/ animal resembling to rabies?<br>a. Yes <input type="checkbox"/> b. No <input type="checkbox"/>                                                                                                                                                                                |
| 2h | Will you visit the hospital if you are scratched by a stray dog/cat? a. Yes <input type="checkbox"/> b. No <input type="checkbox"/>                                                                                                                                                                                                                   |

## 3. Purpose of keeping pet and its housing

|    |                                                                                                                                                                                                                                                                                                                |
|----|----------------------------------------------------------------------------------------------------------------------------------------------------------------------------------------------------------------------------------------------------------------------------------------------------------------|
| 3a | What's the main purpose of owning a dog by you? ( <i>Skip to 4 if you do not have pet animals</i> ) <i>Select one.</i><br>a. Guarding <input type="checkbox"/> b. Companionship <input type="checkbox"/> c. Family/Children wish <input type="checkbox"/><br>d. Hobby <input type="checkbox"/> e. Other: _____ |
| 3b | How do you house your dog? <i>Select all that apply.</i><br>a. Housed in cages <input type="checkbox"/> b. Tied outside the house <input type="checkbox"/><br>c. Free living inside the house <input type="checkbox"/> d. Free to roam around <input type="checkbox"/>                                         |

## 4. History of street or presumed rabid dog/cat bite? (1=Yes, 2=No), Here ORSB= Other rabies susceptible animal bite

| Code | Description         | Presumed rabid dog/cat | Code | Street dog/cat | Code | ORSB | Code | Description     | Presumed rabid dog/ cat | Code | Street dog/ cat | Code | ORSB |
|------|---------------------|------------------------|------|----------------|------|------|------|-----------------|-------------------------|------|-----------------|------|------|
| 44a  | You                 |                        | 44c  |                | 44e  |      | 44g  | Pet animal      |                         | 44i  |                 | 44k  |      |
| 44b  | Your family members |                        | 44d  |                | 44f  |      | 44h  | Domestic animal |                         | 44j  |                 | 44l  |      |

## 5. Demographics

|    |                                                                                                                                                                                                                                                                           |    |                                                   |
|----|---------------------------------------------------------------------------------------------------------------------------------------------------------------------------------------------------------------------------------------------------------------------------|----|---------------------------------------------------|
| 5a | Your gender: Male <input type="checkbox"/> Female <input type="checkbox"/>                                                                                                                                                                                                | 5e | Your age (year eg. 45 year):                      |
| 5b | Your marital status: Married <input type="checkbox"/> Single <input type="checkbox"/> Divorcee <input type="checkbox"/> Other:                                                                                                                                            | 5f | Family size: 6g1. Male: 6g2.Female                |
| 5c | Gender of household head (if HHH is different than the interviewee):<br>a. Male <input type="checkbox"/> b. Female <input type="checkbox"/>                                                                                                                               | 5g | Number of children (<12 years) in your household: |
| 5d | Your ethnicity: a. Brahmin <input type="checkbox"/> b. Chhetri <input type="checkbox"/> c. Aadibasi and Janajati (Newar, Tharu, Gurung, Rai, etc) <input type="checkbox"/><br>d. Madeshi <input type="checkbox"/> e. Musalman <input type="checkbox"/> f.Others, Specify: |    |                                                   |
| 5h | Which religion do you follow? a. Hinduism <input type="checkbox"/> b. Buddhism <input type="checkbox"/> c. Islam <input type="checkbox"/> d. Christianity <input type="checkbox"/> e. Others                                                                              |    |                                                   |
| 5i | Fill in the blanks. I have received .....years of education. OR informal education <input type="checkbox"/>                                                                                                                                                               |    |                                                   |
| 5j | Main occupation of your family:<br>a. Agriculture b. Government job/public services c. Self-employed/Own business d. Private Jobs e. Other, specify:_____                                                                                                                 |    |                                                   |
| 5k | What is the monthly household income of your family?                                                                                                                                                                                                                      |    |                                                   |

Q6. If you would like to share additional thoughts or issues about rabies you can do so here.

Thank you for your time!
